# Supplementary material for: Finely manipulating room temperature phosphorescence by dynamic lanthanide coordination toward multi-level information security
Source: PubMed Central journal article supplement (PMC11078970; doi:10.1038/s41467-024-47674-x), 2024-05-08
Supplement: 41467_2024_47674_MOESM3_ESM.pdf [file 41467_2024_47674_MOESM3_ESM.pdf]

## **Description of Additional Supplementary Files**

**File Name: Supplementary Data 1**

**Description:** The atomic coordinates of the optimized computational models.

**File Name: Supplementary Movie 1**

**Description:** Mis-leading information with arrow pattern.

**File Name: Supplementary Movie 2**

**Description:** The spatial-time-resolved anti-counterfeiting.

**File Name: Supplementary Movie 3**

**Description:** Multi-level encrypted dot matrix (8×5).
